# Supplementary material
Source: PubMed Central journal article supplement (PMC3010731)
Supplement: NIHMS247137-supplement-7.pdf [file NIHMS247137-supplement-7.pdf]

**Material Supplemental Table.** Primers and restriction enzymes used in genotyping and RT-PCR.

|                          | Forward                           | Reverse                          |
|--------------------------|-----------------------------------|----------------------------------|
| <b>Genomic DNA PCR</b>   |                                   |                                  |
| ErbB2                    | 5'-CGGAACCCACATCAGGCC-3'          | 5'-TTTCCTGCAGCCTACGC-3'          |
| VgEcR                    | 5'-TTTCGACGCAGCGTTACGAA-3'        | 5'-GTTGACTCATTATACGCC-3'         |
| RXR $\alpha$             | 5'-TGGCAGTACATCAAGTGTATCATA-3'    | 5'-AGCTGATGACCGAGAAAGG-3'        |
| $\beta$ -Gal             | 5'-CCCCCGCAGATCCCGG-3'            | 5'-GTTTTCCCAGTCACGACG-3'         |
| I $\kappa$ B $\alpha$ SR | 5'-CCCCCGCAGATCCCGG-3'            | 5'-TGGACTACAAAGACGATGACGATAAA-3' |
| <b>RT-PCR</b>            |                                   |                                  |
| I $\kappa$ B $\alpha$ SR | 5'-ATGGACTACAAAGACGATGACGATAAA-3' | 5'-CCAGGCCGCTGTCTGGC-3'          |
| RPL-19                   | 5'-AATGCTCGGATGCCTGAGAA-3'        | 5'-CTCCATGAGGATGCGCTTGT-3'       |
| <b>Real-time PCR</b>     |                                   |                                  |
| MMP-3                    | 5'-TGTCCCCTTCCATCTCTCTC-3'        | 5'-TGGTGATGTCTCAGGTTCCAG-3'      |
| MMP-9                    | TGCCCATTTTCGACGACGAC-3'           | 5'-GTGCAGGCCGAATAGGAGC-3'        |
| Acrp30                   | 5'-AGCCGCTTATATGTATCGCTCA-3'      | 5'-TGCCGTCATAATGATTCTGTTGG-3'    |
| PDGF-AA                  | 5'-TGGCTCGAAGTCAGATCCACA-3'       | 5'-AGCCCCTACGGAGTCTATCTC-3'      |
| ICAM-1                   | 5'-GGCATTGTTCTCTAATGTCTCCG-3'     | 5'-GCTCCAGGTATATCCGAGCTTC-3'     |
| <b>Southern Blot</b>     |                                   |                                  |
| DNA Fragment             | Restrictive Enzyme                | DNA Fragment Size                |
| ErbB2                    | <i>PvuII</i>                      | 1.4kb                            |
| VgEcR                    | <i>BamHI</i> & <i>XbaI</i>        | 2.0kb                            |
| $\beta$ -Gal             | <i>BamHI</i> & <i>XbaI</i>        | 4.0kb                            |
| RXR $\alpha$             | <i>EcoRI</i> & <i>HindIII</i>     | 1.9kb                            |
| I $\kappa$ B $\alpha$ SR | <i>HindIII</i> & <i>XmaI</i>      | 1.2kb                            |
