# Supplementary material
Source: PubMed Central journal article supplement (PMC3010731)
Supplement: NIHMS247137-supplement-8.pdf [file NIHMS247137-supplement-8.pdf]

**Supplemental Table S1.** Genes are regulated by I $\kappa$ B $\alpha$ SR in PISA/ErbB2 transgenic mice treated with Ponasterone A or Placebo.

| Symbol                                        | Name                                                                       | Fold  |
|-----------------------------------------------|----------------------------------------------------------------------------|-------|
| <b>Apoptosis</b>                              |                                                                            |       |
| Fas                                           | Fas (TNF receptor superfamily member)                                      | 2.15  |
| Egln3                                         | EGL nine homolog 3 (C. elegans)                                            | 2.12  |
| <b>Cell adhesion</b>                          |                                                                            |       |
| Dst                                           | dystonin                                                                   | 3.99  |
| Dsg2                                          | desmoglein 2                                                               | 2.21  |
| Rap1gds1                                      | RAP1, GTP-GDP dissociation stimulator 1                                    | 2.17  |
| Pkp1                                          | plakophilin 1                                                              | -4.39 |
| Lamb3                                         | laminin, beta 3                                                            | -5.57 |
| Celsr1                                        | cadherin EGF LAG seven-pass G-type receptor 1                              | 4.40  |
| <b>Cell cycle</b>                             |                                                                            |       |
| Ccng1                                         | cyclin G1                                                                  | 2.03  |
| Cdc27                                         | cell division cycle 27 homolog (S. cerevisiae)                             | 2.06  |
| Cgref1                                        | cell growth regulator with EF hand domain 1                                | -2.03 |
| Esco1                                         | establishment of cohesion 1 homolog 1 (S. cerevisiae)                      | 6.76  |
| Esco2                                         | establishment of cohesion 1 homolog 2 (S. cerevisiae)                      | 2.71  |
| Nipbl                                         | Nipped-B homolog (Drosophila)                                              | 2.51  |
| Rb1cc1                                        | RB1-inducible coiled-coil 1                                                | 2.92  |
| Rif1                                          | Rap1 interacting factor 1 homolog (yeast)                                  | 3.80  |
| Skp2                                          | S-phase kinase-associated protein 2 (p45)                                  | 2.08  |
| Smc4                                          | structural maintenance of chromosomes 4                                    | 3.47  |
| <b>Chromosome organization and biogenesis</b> |                                                                            |       |
| Arid4b                                        | AT rich interactive domain 4B (Rbp1 like)                                  | 2.46  |
| Atrx                                          | alpha thalassemia/mental retardation syndrome X-linked homolog (human)     | 2.47  |
| Rif1                                          | Rap1 interacting factor 1 homolog (yeast)                                  | 2.25  |
| Smarca3                                       | SWI/SNF related, matrix associated, actin dependent regulator of chromatin | 2.22  |
| Smc2                                          | structural maintenance of chromosomes 2                                    | 2.41  |
| Smc6                                          | structural maintenance of chromosomes 6                                    | 2.41  |
| Stag2                                         | stromal antigen 2                                                          | 2.27  |
| <b>Cytoskeleton organization</b>              |                                                                            |       |
| Epb4.113                                      | erythrocyte protein band 4.1-like 3                                        | -2.29 |
| Gsn                                           | gelsolin                                                                   | -2.39 |
| Krt19                                         | keratin 19                                                                 | -5.22 |
| Lcp1                                          | lymphocyte cytosolic protein 1                                             | 2.13  |
| Mid1                                          | midline 1                                                                  | 8.77  |
| Rock1                                         | Rho-associated coiled-coil containing protein kinase 1                     | 2.68  |

Sgcb

sarcoglycan, beta (dystrophin-associated glycoprotein)

2.54

|                                         |                                                                 |        |
|-----------------------------------------|-----------------------------------------------------------------|--------|
| <b>Defense</b>                          |                                                                 |        |
| Ccdc18                                  | coiled-coil domain containing 18                                | 2.72   |
| B2m                                     | beta-2 microglobulin                                            | 2.21   |
| H2-Ab1                                  | histocompatibility 2, class II antigen A, beta 1                | -3.03  |
| <b>DNA damage response</b>              |                                                                 |        |
| Brcal                                   | breast cancer 1                                                 | 2.71   |
| Brip1                                   | BRCA1 interacting protein C-terminal helicase 1                 | 2.16   |
| <b>Metabolism</b>                       |                                                                 |        |
| Acad9                                   | acyl-Coenzyme A dehydrogenase family, member 9                  | -4.48  |
| Adipoq                                  | adiponectin, C1Q and collagen domain containing                 | -9.52  |
| Amacr                                   | alpha-methylacyl-CoA racemase                                   | 2.50   |
| Car3                                    | carbonic anhydrase 3                                            | -32.08 |
| Chpt1                                   | choline phosphotransferase 1                                    | 3.26   |
| Crot                                    | carnitine O-octanoyltransferase                                 | 2.05   |
| Glul                                    | glutamate-ammonia ligase (glutamine synthetase)                 | -2.35  |
| Gne                                     | glucosamine                                                     | 3.44   |
| Lao1                                    | L-amino acid oxidase 1                                          | -5.82  |
| Plcb4                                   | phospholipase C, beta 4                                         | 3.40   |
| Sod3                                    | superoxide dismutase 3, extracellular                           | -2.41  |
| <b>Microtubule-based movement</b>       |                                                                 |        |
| Cenpe                                   | centromere protein E                                            | 2.63   |
| Ktn1                                    | kinectin 1                                                      | 2.53   |
| Mphosph1                                | M-phase phosphoprotein 1                                        | 3.12   |
| <b>Protein biosynthesis and folding</b> |                                                                 |        |
| Hspb1                                   | heat shock protein 1                                            | -2.11  |
| Pcmt1                                   | protein-L-isoaspartate (D-aspartate) O-methyltransferase domain | 2.07   |
| Ppig                                    | peptidyl-prolyl isomerase G (cyclophilin G)                     | 2.31   |
| Rpl17                                   | ribosomal protein L17                                           | 3.79   |
| Upf2                                    | UPF2 regulator of nonsense transcripts homolog (yeast)          | 2.24   |
| <b>Proteolysis</b>                      |                                                                 |        |
| Cfd                                     | complement factor D (adipsin)                                   | -13.93 |
| Cpd                                     | carboxypeptidase D                                              | 2.55   |
| Hp                                      | haptoglobin                                                     | -5.50  |
| Tfrc                                    | transferrin receptor                                            | 2.07   |
| Usp9x                                   | ubiquitin specific peptidase 9, X chromosome                    | 2.49   |

**RNA processing**

|         |                                                       |      |
|---------|-------------------------------------------------------|------|
| Pabpc1  | poly A binding protein, cytoplasmic 1                 | 2.14 |
| Prpf40a | PRP40 pre-mRNA processing factor 40 homolog A (yeast) | 2.06 |
| Prpf4b  | PRP4 pre-mRNA processing factor 4 homolog B (yeast)   | 2.59 |
| Ssb     | Sjogren syndrome antigen B                            | 2.30 |

**Signal transduction**

|          |                                                             |       |
|----------|-------------------------------------------------------------|-------|
| Arhgap12 | Rho GTPase activating protein 12                            | 3.23  |
| Arhgap29 | Rho GTPase activating protein 29                            | 2.91  |
| Arhgap5  | Rho GTPase activating protein 5                             | 2.89  |
| Cdc42ep5 | CDC42 effector protein (Rho GTPase binding) 5               | -2.03 |
| Cmklr1   | chemokine-like receptor 1                                   | -3.47 |
| Depdc1a  | DEP domain containing 1a                                    | 2.38  |
| Eif2ak2  | eukaryotic translation initiation factor 2-alpha kinase 2   | 2.08  |
| Erb2ip   | Erb2 interacting protein                                    | 2.16  |
| Gab2     | growth factor receptor bound protein 2-associated protein 2 | 2.55  |
| Ghr      | growth hormone receptor                                     | 2.56  |
| Lphn3    | latrophilin 3                                               | 2.80  |
| Mtmr6    | myotubularin related protein 6                              | 2.01  |
| Narg1    | NMDA receptor-regulated gene 1                              | 2.13  |
| Phip     | pleckstrin homology domain interacting protein              | 2.15  |
| Pik3c2a  | phosphatidylinositol 3-kinase, C2 domain containing         | 2.20  |
| Plek     | pleckstrin                                                  | 2.60  |
| Rab27b   | RAB27b, member RAS oncogene family                          | 2.27  |
| Rasa1    | RAS p21 protein activator 1                                 | 2.02  |
| Rgs5     | regulator of G-protein signaling 5                          | 3.75  |
| Riok3    | RIO kinase 3 (yeast)                                        | 3.89  |
| Stk3     | serine/threonine kinase 3 (Ste20, yeast homolog)            | 2.40  |
| Utrn     | utrophin                                                    | 2.12  |
| Vdr      | vitamin D receptor                                          | -2.76 |
| Zfp292   | zinc finger protein 292                                     | 2.06  |

**Transcription**

|               |                                                         |       |
|---------------|---------------------------------------------------------|-------|
| 2610101J03Rik | RIKEN cDNA 2610101J03 gene                              | 3.11  |
| 2810408B13Rik | RIKEN cDNA 2810408B13 gene                              | 2.73  |
| 4921520G13Rik | RIKEN cDNA 4921520G13 gene                              | 2.35  |
| 6330416L07Rik | RIKEN cDNA 6330416L07 gene                              | 4.00  |
| 8430426H19Rik | RIKEN cDNA 8430426H19 gene                              | 3.02  |
| AI987944      | expressed sequence AI987944                             | 2.66  |
| BC003267      | cDNA sequence BC003267                                  | 2.41  |
| BC049807      | cDNA sequence BC049807                                  | 2.98  |
| Cops2         | COP9 (constitutive photomorphogenic) homolog, subunit 2 | 2.65  |
| Dtx1          | deltex 1 homolog (Drosophila)                           | 2.47  |
| Foxa1         | forkhead box A1                                         | -3.91 |
| Hoxb2         | homeo box B2                                            | -3.72 |

|           |                                                    |       |
|-----------|----------------------------------------------------|-------|
| Irx1      | Iroquois related homeobox 1 (Drosophila)           | -2.05 |
| Lcorl     | ligand dependent nuclear receptor corepressor-like | 2.28  |
| LOC434179 | NA                                                 | 2.92  |
| MGC107415 | NA                                                 | 2.81  |
| Mkx       | mohawk                                             | 3.36  |
| Nsbp1     | nucleosome binding protein 1                       | 2.76  |
| Pou2af1   | POU domain, class 2, associating factor 1          | -4.96 |
| Suz12     | suppressor of zeste 12 homolog (Drosophila)        | 2.45  |
| Tb11xr1   | transducin (beta)-like 1X-linked receptor 1        | -2.61 |
| Tcf12     | transcription factor 12                            | 2.11  |
| Tcf4      | transcription factor 4                             | 2.50  |
| Thrap1    | thyroid hormone receptor associated protein 1      | 2.01  |
| Top2b     | topoisomerase (DNA) II beta                        | 3.09  |
| Tsc22d3   | TSC22 domain family 3                              | -2.59 |
| Zbtb16    | zinc finger and BTB domain containing 16           | -6.10 |
| Zfml      | zinc finger, matrin-like                           | 3.06  |
| Zfp101    | zinc finger protein 101                            | 2.14  |
| Zfp120    | zinc finger protein 120                            | 2.56  |
| Zfp148    | zinc finger protein 148                            | 2.16  |
| Zfp182    | zinc finger protein 182                            | 6.61  |
| Zfp386    | zinc finger protein 386 (Kruppel-like)             | 2.62  |
| Zfp40     | zinc finger protein 40                             | 2.35  |
| Zfp51     | zinc finger protein 51                             | 2.17  |
| Zfp52     | zinc finger protein 52                             | 2.45  |
| Zfp62     | zinc finger protein 62                             | 3.29  |
| Zfp758    | zinc finger protein 758                            | 2.31  |

### Transport

|         |                                                                           |        |
|---------|---------------------------------------------------------------------------|--------|
| Abca1   | ATP-binding cassette, sub-family A (ABC1), member 1                       | 2.89   |
| Acad9   | acyl-Coenzyme A dehydrogenase family, member 9                            | -3.01  |
| Apod    | apolipoprotein D                                                          | -3.27  |
| Atp1a1  | ATPase, Na <sup>+</sup> /K <sup>+</sup> transporting, alpha 1 polypeptide | 2.02   |
| Cplx2   | complexin 2                                                               | -2.04  |
| Csn1s1  | casein alpha s1                                                           | -7.99  |
| Csn1s2a | casein alpha s2-like A                                                    | -11.72 |
| Csn2    | casein beta                                                               | -26.78 |
| Cyp51   | cytochrome P450, family 51                                                | 3.18   |
| Fmo1    | flavin containing monooxygenase 1                                         | -3.52  |
| Fxyd6   | FXFD domain-containing ion transport regulator 6                          | -2.60  |
| Kcnq1   | potassium voltage-gated channel, subfamily Q, member 1                    | 5.38   |
| Kif18a  | kinesin family member 18A                                                 | 2.34   |
| Kif5b   | kinesin family member 5B                                                  | 14.39  |
| Maob    | monoamine oxidase B                                                       | -2.70  |
| Mup1    | major urinary protein 1                                                   | -15.11 |
| Rabep1  | rabaptin, RAB GTPase binding effector protein 1                           | 2.66   |

|                        |                                                                     |       |
|------------------------|---------------------------------------------------------------------|-------|
| Scn4b                  | sodium channel, type IV, beta                                       | -3.36 |
| Slc18a2                | solute carrier family 18 (vesicular monoamine), member 2            | 2.55  |
| Slc28a3                | solute carrier family 28 (sodium-coupled nucleoside transporter)    | -7.58 |
| Slc39a4                | solute carrier family 39 (zinc transporter), member 4               | -2.12 |
| Slc5a8                 | solute carrier family 5 (iodide transporter), member 8              | 2.18  |
| Slc6a14                | solute carrier family 6 (neurotransmitter transporter)              | 2.21  |
| Slc7a5                 | solute carrier family 7                                             | -2.44 |
| Sybl1                  | synaptobrevin like 1                                                | 2.38  |
| Tfrc                   | transferrin receptor                                                | 2.35  |
| Trpm7                  | transient receptor potential cation channel, subfamily M, member 7  | 2.28  |
| Vamp1                  | vesicle-associated membrane protein 1                               | 2.61  |
| <b>Ubiquitin cycle</b> |                                                                     |       |
| Fbxl21                 | F-box and leucine-rich repeat protein 21                            | 2.18  |
| Fbxo2                  | F-box only protein 2                                                | -2.52 |
| Herc5                  | hect domain and RLD 5                                               | 2.36  |
| Usp14                  | ubiquitin specific peptidase 14                                     | 2.45  |
| <b>Others</b>          |                                                                     |       |
| Fxr1h                  | fragile X mental retardation gene 1, autosomal homolog              | 2.76  |
| Orc4l                  | origin recognition complex, subunit 4-like ( <i>S. cerevisiae</i> ) | 2.06  |
| Rnf128                 | ring finger protein 128                                             | 2.15  |
| Ttc7                   | tetratricopeptide repeat domain 7                                   | 2.21  |

---

**Supplemental Table S2. Genes related to angiogenesis regulated by I $\kappa$ B $\alpha$ SR in**

PISA/ErbB2 transgenic mice.

| <b>Symbol</b>                                               | <b>Name</b>                                   | <b>Fold</b> | <b>Angiogenesis</b> |
|-------------------------------------------------------------|-----------------------------------------------|-------------|---------------------|
| <b>Specific Promoters &amp; Inhibitors:</b>                 |                                               |             |                     |
| AMOT                                                        | Angiomotin                                    | -1.3        | P                   |
| ANGPT1                                                      | Angiopoietin 1                                | -1.79       | P                   |
| ANGPT2                                                      | Angiopoietin 2                                | 1.85        | I                   |
| <b>Growth Factors &amp; Receptors:</b>                      |                                               |             |                     |
| EFNA2                                                       | Ephrin A2                                     | -1.59       | P                   |
| EFNA5                                                       | Ephrin A2                                     | 1.73        | P                   |
| EFNB2                                                       | Ephrin B2                                     | 1.4         | P                   |
| <b>Fibroblast Growth Factor &amp; Receptor:</b>             |                                               |             |                     |
| FGF7                                                        | Fibroblast growth factor 7                    | 1.69        | P                   |
| FGFR1                                                       | Fibroblast growth factor receptor 1           | -1.57       | P                   |
| FGFR3                                                       | Fibroblast growth factor receptor 3           | -1.31       | P                   |
| <b>Platelet-derived Growth Factor &amp; Receptors:</b>      |                                               |             |                     |
| PDGFA                                                       | Platelet derived growth factor alpha          | 1.38        | P                   |
| PDGFRA                                                      | Platelet derived growth factor receptor alpha | -1.51       | P                   |
| <b>Transforming Growth Factor &amp; Receptors:</b>          |                                               |             |                     |
| TGFA                                                        | Transforming growth factor alpha              | -1.64       | P                   |
| TGFB2                                                       | Transforming growth factor beta 2             | 1.84        | P                   |
| TGFB3                                                       | Transforming growth factor beta 3             | 1.69        | P                   |
| TGFBR1                                                      | Transforming growth factor beta receptor I    | 1.54        | P                   |
| TGFBR2                                                      | Transforming growth factor receptor II        | 1.43        | P                   |
| <b>Vascular Endothelial Growth Factors &amp; Receptors:</b> |                                               |             |                     |
| FIGF                                                        | c-fos induced growth factor                   | -1.44       | P                   |
| PGF                                                         | Placental growth factor                       | 1.36        | N/A                 |
| VEGFC                                                       | Vascular endothelial growth factor alpha      | -1.98       | P                   |
| EGF                                                         | Epidermal growth factor                       | -1.63       | P                   |
| GRO1                                                        | Chemokine ligand 1                            | -1.73       | P                   |
| HGF                                                         | Hepatocyte growth factor                      | -1.37       | P                   |
| IGF1                                                        | Insulin-like growth factor 1                  | -1.39       | P                   |
| <b>Cytokines &amp; Chemokines:</b>                          |                                               |             |                     |
| CSF                                                         | Colony stimulating factor 3                   | -1.33       | P                   |
| NRP1                                                        | Neuropilin 1                                  | 1.34        | P                   |
| PTN                                                         | Pleiotrophin                                  | -1.31       | P                   |
| TRAC                                                        | T-cell RING protein in activation 1           | -1.56       | P                   |

**Matrix Proteins Protease & Inhibitors:**

|       |                                         |       |   |
|-------|-----------------------------------------|-------|---|
| MMP2  | Matrix metalloproteinase 2              | -2.35 | P |
| MMP3  | Matrix metalloproteinase 3              | -2.21 | P |
| MSR1  | Macrophage scavenger receptor 1         | 1.31  | P |
| TBHS3 | Thrombospondin 3                        | -1.54 | P |
| TIMP1 | Tissue inhibitor of metalloproteinase 1 | -2.0  | P |
| TIMP2 | Tissue inhibitor of metalloproteinase 2 | -1.27 | P |

**Transcription Factors:**

|       |                            |       |   |
|-------|----------------------------|-------|---|
| HIF1A | Hypoxia inducible factor   | 1.4   | P |
| ID1   | Inhibitor of DNA binding 1 | -1.56 | P |

**Other Related Genes:**

|       |                                       |       |   |
|-------|---------------------------------------|-------|---|
| ENG   | Endoglin                              | -1.31 | P |
| PTGS1 | Prostaglandin-endoperoxide synthase 1 | -1.58 | P |
| RSN   | Restin                                | 1.39  | I |
| SPP1  | Secreted phosphoprotein 1             | -1.49 | P |

---

P: Promote Angiogenesis. I: Inhibit Angiogenesis
